# Supplementary material
Source: Springer Nature journal article supplement (https://www.springermedizin.de/resource/supplementary/12913_2008_889_MOESM2_ESM.pdf/9536220)

# Research and Development

- % OPs use R&D:
- Importance of R&D (0-100):
- Involvement of R&D in Education and Training in EBM (%)
- Involvement of R&D in developing Products & Tools (%)

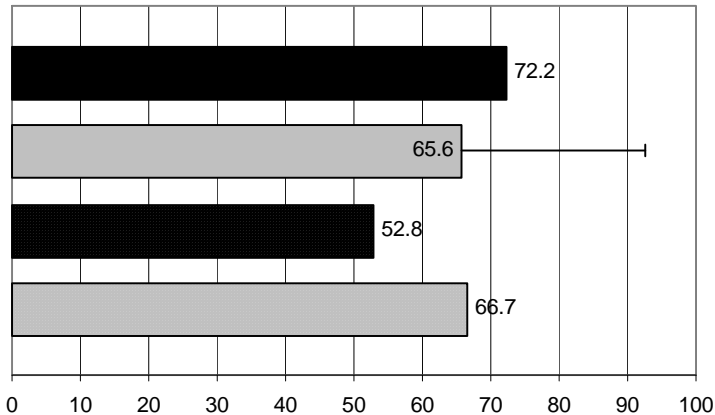

Supplement: MOESM2 [file 9536220]
